# Supplementary material for: Enhancing the luminescence of carbon nanodots in films by tailoring the functional groups through alkylamine-functionalization and reduction
Source: Royal Society of Chemistry journal article supplement (doi:10.1039/c9cp05241k), 2019-01-01
Supplement: c9cp05241k1.pdf [file c9cp05241k1.pdf]

**Supporting Information**

**Enhancing Luminescence of Carbon Nanodots in Films by  
Tailoring Functional Groups through Alkylamine-  
functionalization and Reduction**

Minsu Kim,<sup>a</sup> Phil Woong Kang,<sup>a</sup> Sunjoong Park,<sup>b</sup> Duk Young Jeon,<sup>b</sup> and Hyunjoo Lee<sup>a\*</sup>

<sup>a</sup> Department of Chemical and Biomolecular Engineering, Korea Advanced Institute of Science and Technology, Daejeon 34141, Republic of Korea; <sup>b</sup> Department of Materials Science and Engineering, Korea Advanced Institute of Science and Technology, Daejeon 34141, Republic of Korea.

**Supporting Information contains:**

Table S1-S3

Figure S1-S11

---

\* Corresponding author: [azhyun@kaist.ac.kr](mailto:azhyun@kaist.ac.kr)

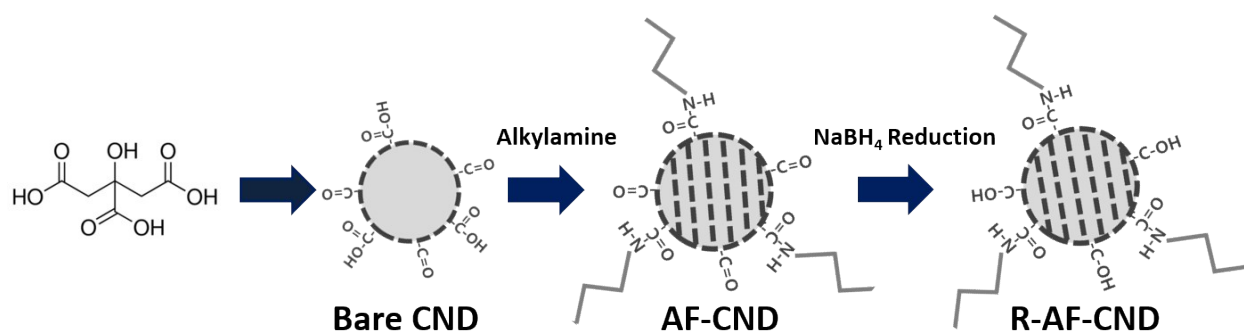

**Figure S1.** Schematics for the chemical structure of CNDs after alkyamine-functionalization and reduction.

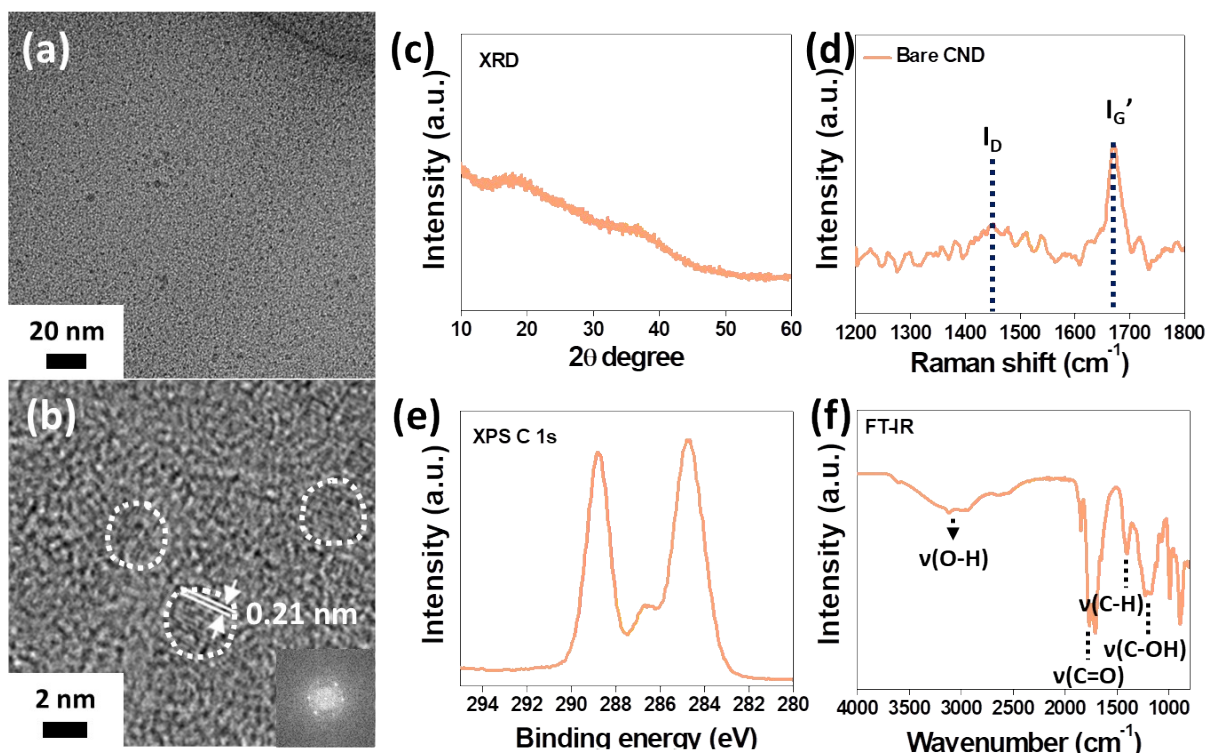

**Figure S2.** (a, b) HR-TEM image of bare CNDs. The bare CND showed lattice parameter of 0.21 nm corresponding to (100) inter-planar spacing (the inset shows a FFT image). (c) XRD pattern, (d) Raman spectrum with peaks assigned to the corresponding the D and G band, (e) XPS C 1s spectrum, and (f) FT-IR spectrum of bare CNDs with peaks assigned to its corresponding bonds.

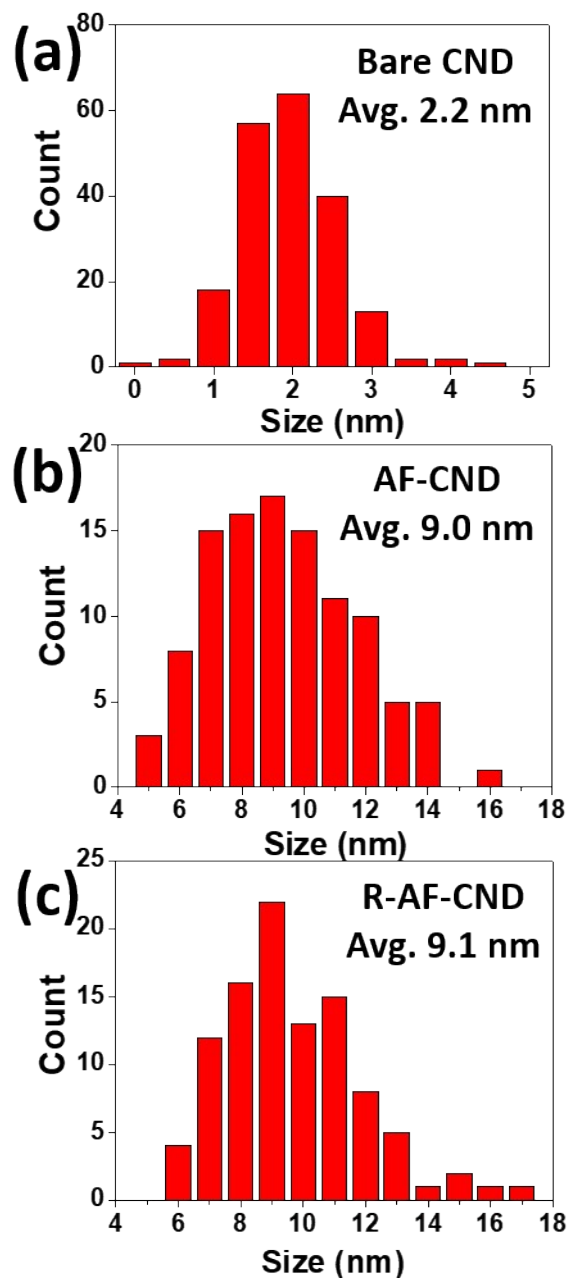

**Figure S3.** Size histograms of (a) bare CNDs, (b) alkyl chain-functionalized CNDs (AF-CNDs), and (c) reduced AF-CND (R-AF-CND).

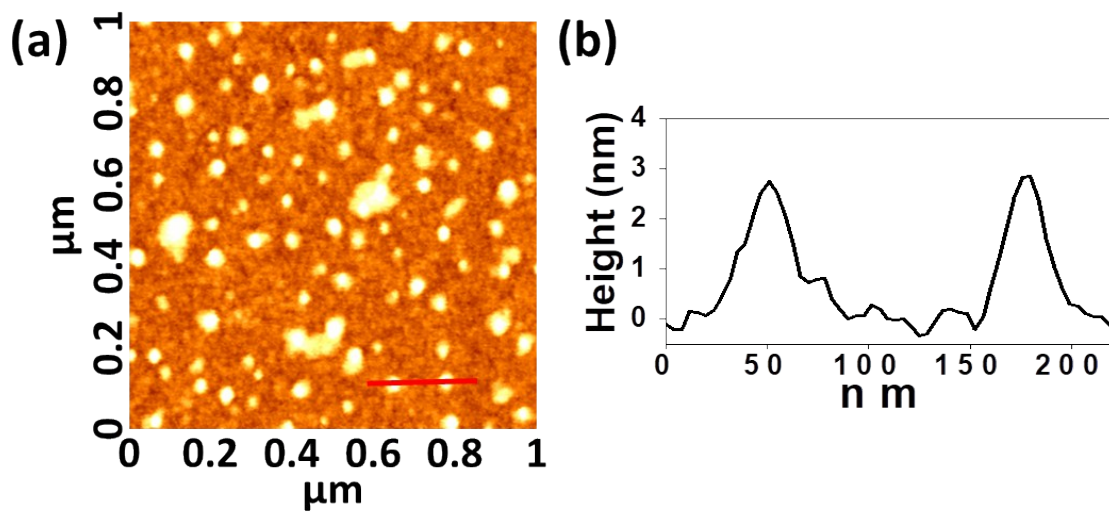

Figure S4. (a) AFM image and (b) a line profile (red line in (a)) of R-AF-CNDs.

**Table S1.** PL decay times ( $\tau_1$ ,  $\tau_2$ ) and average lifetimes ( $T_{\text{avg}}$ ) estimated from the PL decay curves in Figure 2c<sup>a,b</sup> (excitation at 375 nm)

| Sample               | Det. Wav. (nm) | $T_{\text{avg}}$ (ns) | $\tau_1$ (B1)          | $f_1$ (%) | $\tau_2$ (B2)          | $f_2$ (%) | A     | $\chi^2$ |
|----------------------|----------------|-----------------------|------------------------|-----------|------------------------|-----------|-------|----------|
| Bare CNDs in ethanol | 461            | 4.69                  | 1.163 ns<br>(5296.134) | 32.2      | 6.361 ns<br>(2037.265) | 67.8      | 0.448 | 1.191    |
| AF-CNDs in hexane    | 450            | 6.22                  | 2.452 ns<br>(6264.932) | 34.1      | 8.165 ns<br>(3634.328) | 65.9      | 0.719 | 1.242    |
| R-AF-CNDs in hexane  | 445            | 8.88                  | 3.197 ns<br>(4394.988) | 20.2      | 10.32 ns<br>(5389.898) | 79.8      | 1.341 | 1.186    |

<sup>a</sup> Intensity =  $A+B1\exp(-t/\tau_1)+B2\exp(-t/\tau_2)$

<sup>b</sup>  $T_{\text{avg}} = f_1 \tau_1 + f_2 \tau_2$

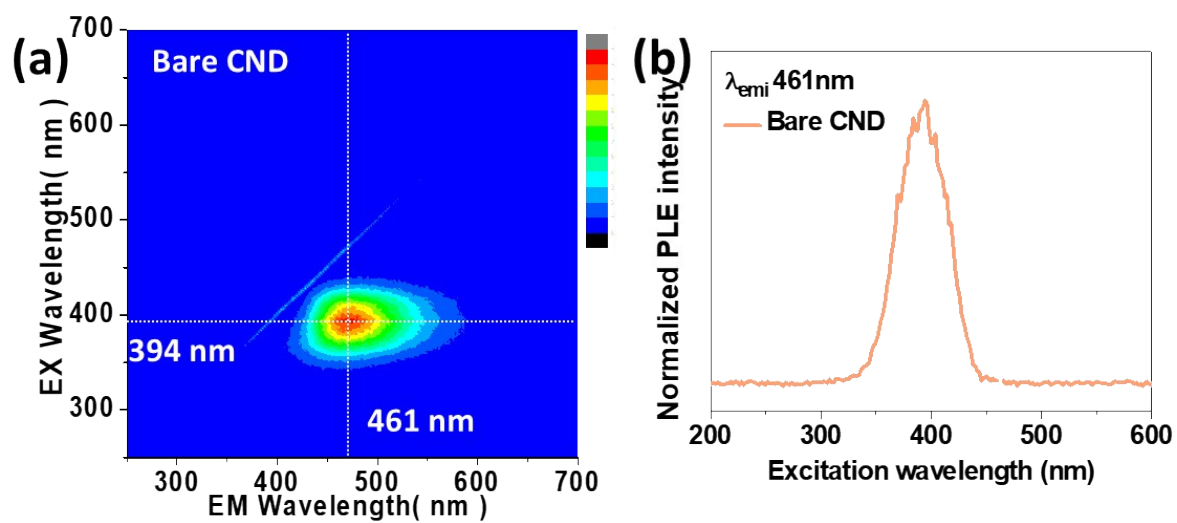

**Figure S5.** (a) Photoluminescence map and (b) photoluminescence excitation (PLE) spectrum for bare CNDs.

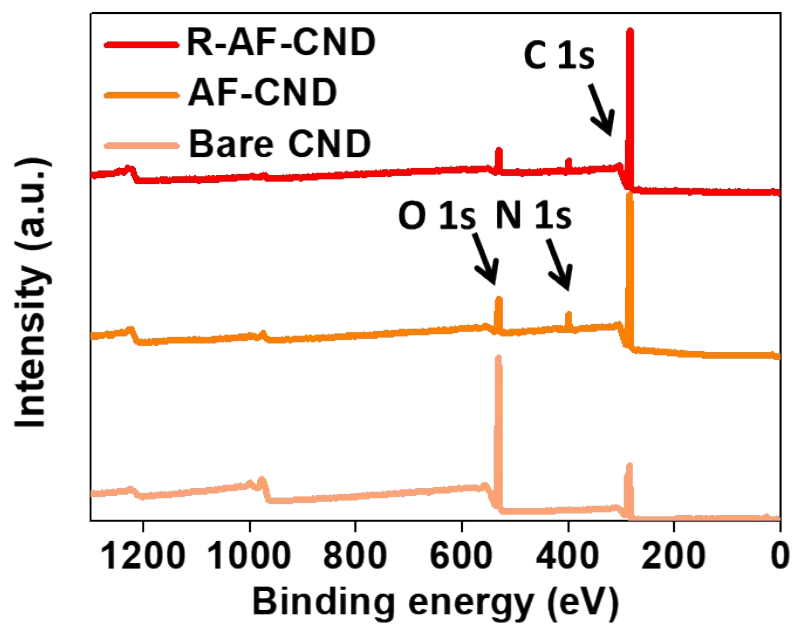

**Figure S6.** XPS survey spectra of bare CNDs, AF-CNDs, and R-AF-CNDs.



**Table S2.** The changes in C, N, O contents in bare CNDs, AF-CNDs, and R-AF-CNDs determined by XPS survey scan

| Sample    | C<br>(atomic%) | N<br>(atomic%) | O<br>(atomic%) | Others<br>(atomic%) |
|-----------|----------------|----------------|----------------|---------------------|
| Bare CNDs | 55.6           | -              | 44.4           | -                   |
| AF-CNDs   | 85.2           | 5.2            | 9.5            | -                   |
| R-AF-CNDs | 88.9           | 3.8            | 6.0            | 1.3                 |

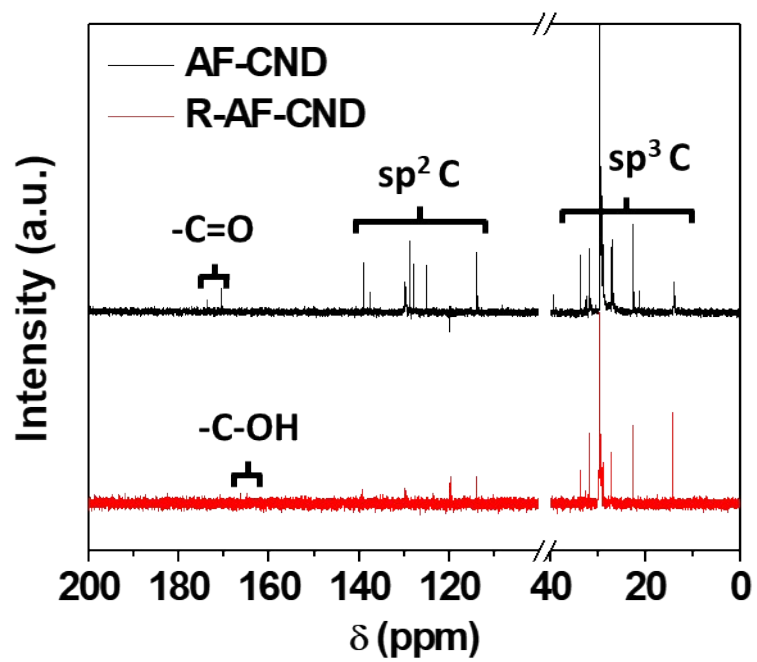

Figure S7.  $^{13}\text{C}$  NMR results of AF-CNDs and R-AF-CNDs.

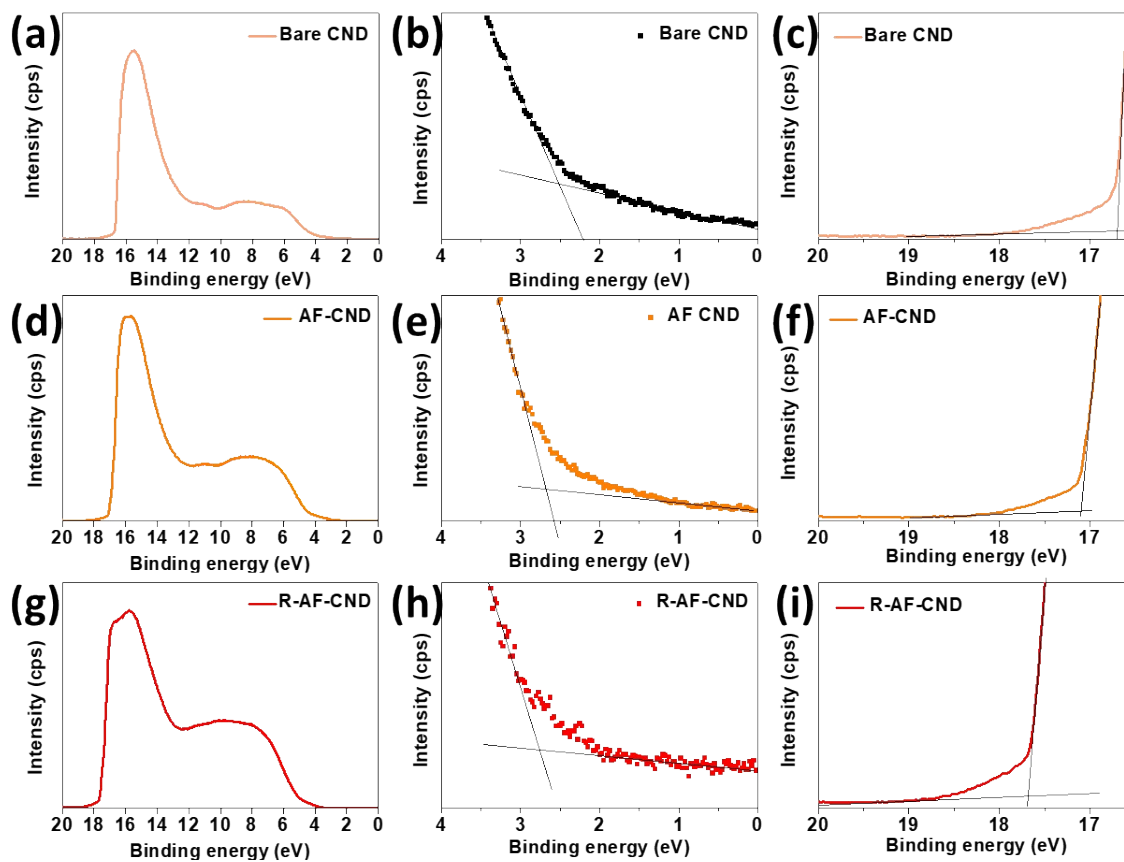

**Figure S8.** UPS data of (a-c) bare CNDs, (d-f) AF-CNDs, and (g-i) R-AF-CNDs

**Table S3.** PLE onset wavelength, energy band gap, HOMO, and LUMO level of bare CNDs, AF-CNDs, and R-AF-CNDs<sup>a</sup>

| Sample    | $\lambda_{\text{ex, onset}}^{\text{b}}$<br>(nm) | $E_{\text{g}}^{\text{c}}$<br>(eV) | $E_{\text{cutoff}}^{\text{d}}$<br>(eV) | $E_{\text{Fermi}}^{\text{d}}$<br>(eV) | HOMO <sup>e</sup><br>(eV) | LUMO <sup>f</sup><br>(eV) |
|-----------|-------------------------------------------------|-----------------------------------|----------------------------------------|---------------------------------------|---------------------------|---------------------------|
| Bare CNDs | 394                                             | 3.15                              | 16.68                                  | 2.53                                  | 7.05                      | 3.9                       |
| AF-CNDs   | 394                                             | 3.15                              | 17.07                                  | 2.68                                  | 6.81                      | 3.6                       |
| R-AF-CNDs | 412                                             | 3.01                              | 17.66                                  | 2.75                                  | 6.29                      | 3.28                      |

<sup>a</sup> The incident photon energy from He I source is 21.2 eV and the -9 V bias was applied to make a clear boundary in the  $E_{\text{cutoff}}$  region.

<sup>b</sup> The onset wavelength of photoluminescence excitation ( $\lambda_{\text{ex, onset}}$ ) were obtained from Figure 3 and Figure S5.

<sup>c</sup> The optical band gap ( $E_{\text{g}}$ ) was obtained by a following equation;

$$E_{\text{g}} = 1240 / \lambda_{\text{ex, onset}}$$

<sup>d</sup> The  $E_{\text{cutoff}}$  and  $E_{\text{Fermi}}$  were extracted by the intersection between the base line and a linear fit from near Fermi energy region (Figure S8 (b,e,h)) and secondary electron cut-off region (Figure S8 (c,f,i)).

<sup>e</sup> The HOMO level was calculated by a following equation;

$$\text{HOMO (eV)} = h\nu \text{ (incident photon energy, 21.1 eV)} - E_{\text{cutoff}} + E_{\text{Fermi}}$$

<sup>f</sup> The LUMO level was calculated by a following equation;

$$\text{LUMO (eV)} = \text{HOMO (eV)} - E_{\text{g}}$$

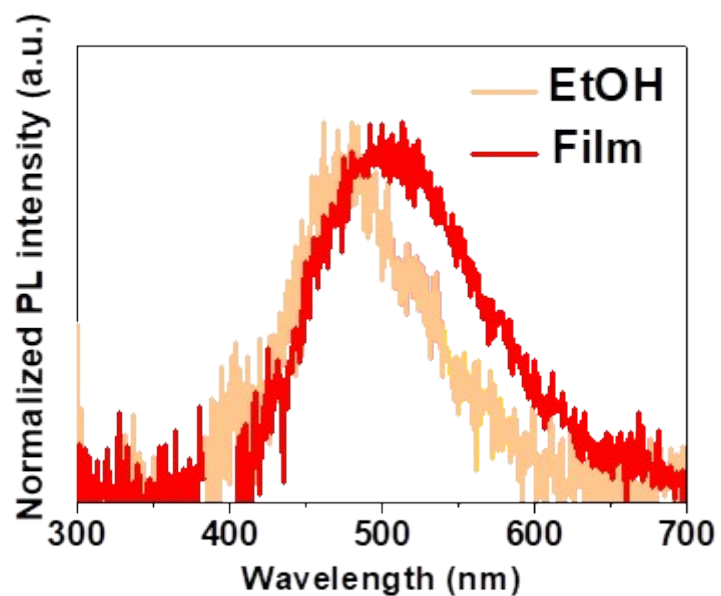

**Figure S9.** Normalized PL spectra (excitation at 390 nm) of bare CNDs in a solution (ethanol) and a film. The PLQY was 5.9% for the solution and 3.9% for the film. FWHM was 91 nm for the solution and 124 nm for the film.

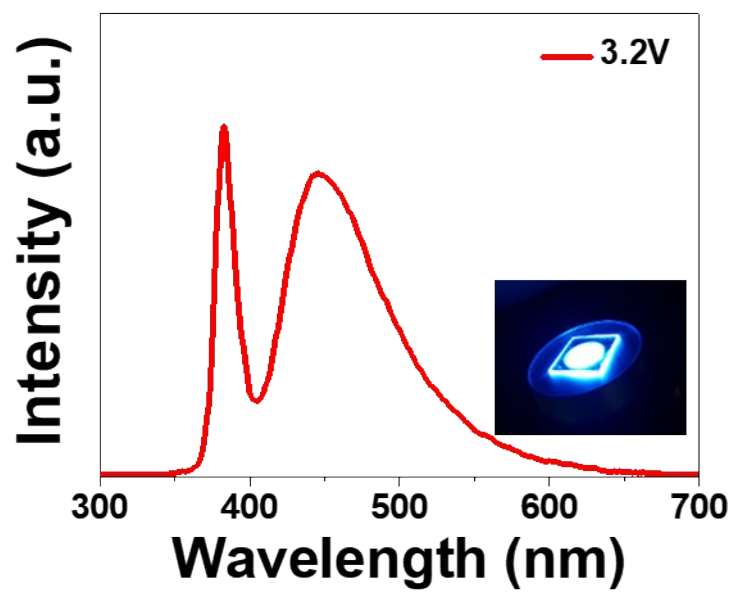

**Figure S10.** Photoluminescence spectrum of blue LED using R-AF-CNDs with 385 nm UV chip. The inset photograph shows R-AF-CND film under UV light.

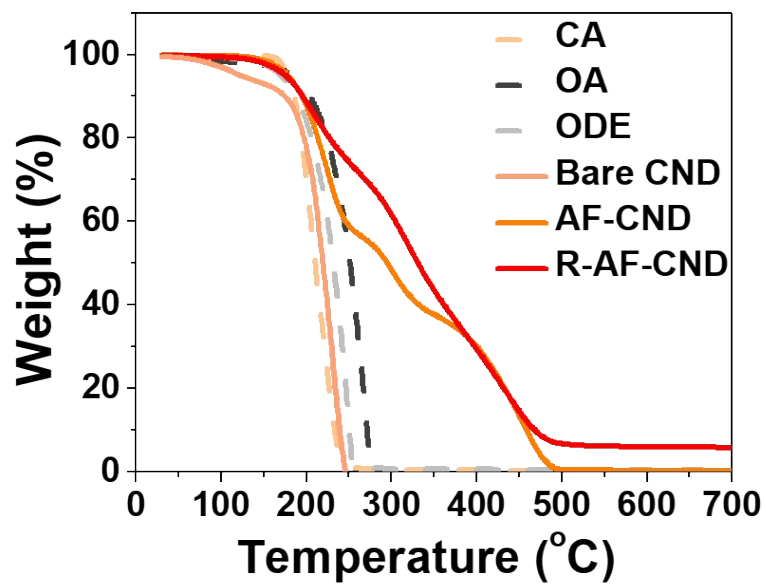

**Figure S11.** TGA results of the CNDs. CA indicates citric acid, OA indicates oleylamine, and ODE indicates octadecene.
